# Supplementary material for: Facile fabrication of a near-infrared responsive nanocarrier for spatiotemporally controlled chemo-photothermal synergistic cancer therapy
Source: Royal Society of Chemistry journal article supplement (doi:10.1039/c4nr01044b), 2014-01-01
Supplement: c4nr01044b1.pdf [file c4nr01044b1.pdf]

## Facile fabrication of a near-infrared responsive nanocarrier for spatiotemporally controlled chemophotothermal synergistic cancer therapy

Hao Wan,<sup>ab</sup> Yi Zhang,<sup>a</sup> Zheyi Liu,<sup>a</sup> Guiju Xu,<sup>a</sup> Guang Huang,<sup>a</sup> Yongsheng Ji,<sup>a</sup> Zhichao Xiong,<sup>ab</sup> Quanqing Zhang,<sup>a</sup> Jing Dong,<sup>a</sup> Weibing Zhang<sup>\*b</sup> and Hanfa Zou<sup>\*a</sup>

<sup>a</sup> CAS Key Laboratory of Separation Sciences for Analytical Chemistry, National Chromatographic R&A Center, Dalian Institute of Chemical Physics, Chinese Academy of Sciences (CAS), Dalian 116023, China;

E-mail: hanfazou@dicp.ac.cn

<sup>b</sup> Shanghai Key Laboratory of Functional Materials Chemistry, East China University of Science and Technology, Shanghai 200237, China.

E-mail: weibingzhang@ecust.edu.cn

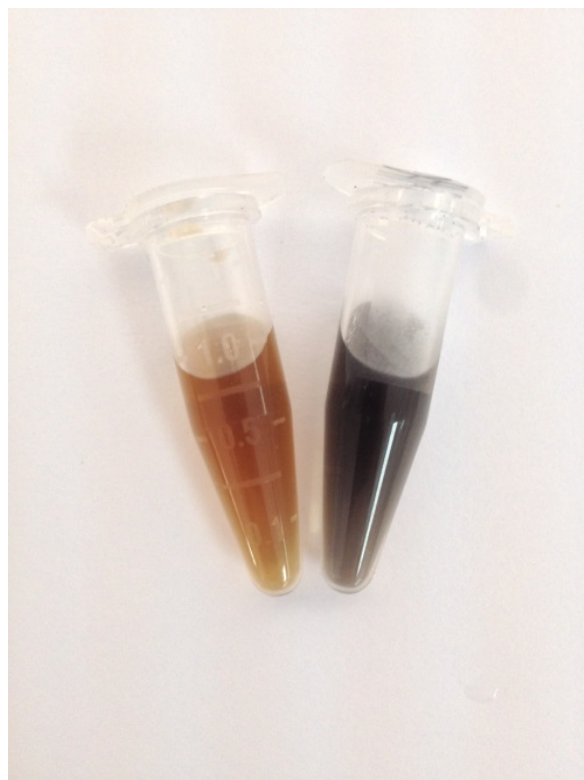

Fig. S1 The images of NGO (left) and rNGO (right).

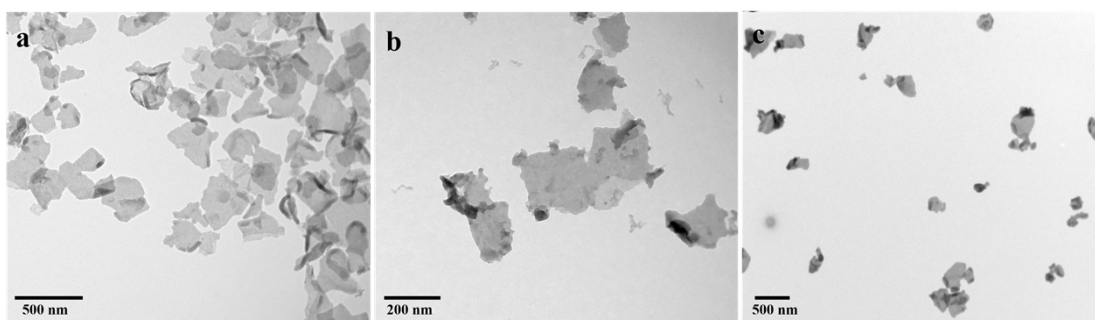

Fig. S2 TEM images of rNGO@mSiO<sub>2</sub> (a) and rNGO@mSiO<sub>2</sub>@pNIPAM-co-pAAm (b, c)

| NIPAM (g) | AAm (g) | LCST (°C ) |
|-----------|---------|------------|
| 1.90      | 0.1     | 33         |
| 1.80      | 0.1     | 36         |
| 1.80      | 0.18    | 41         |

Table S3 The LCST of rNGO@mSiO<sub>2</sub>@pNIPAM-co-pAAm in different composition ratios.

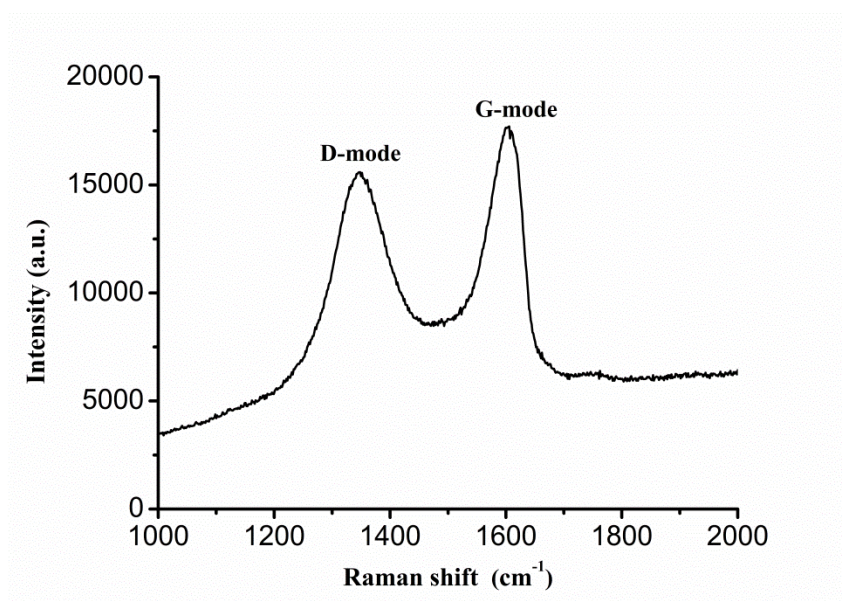

Fig. S4 The Raman spectrum of rNGO@mSiO<sub>2</sub>@pNIPAM-co-pAAm.

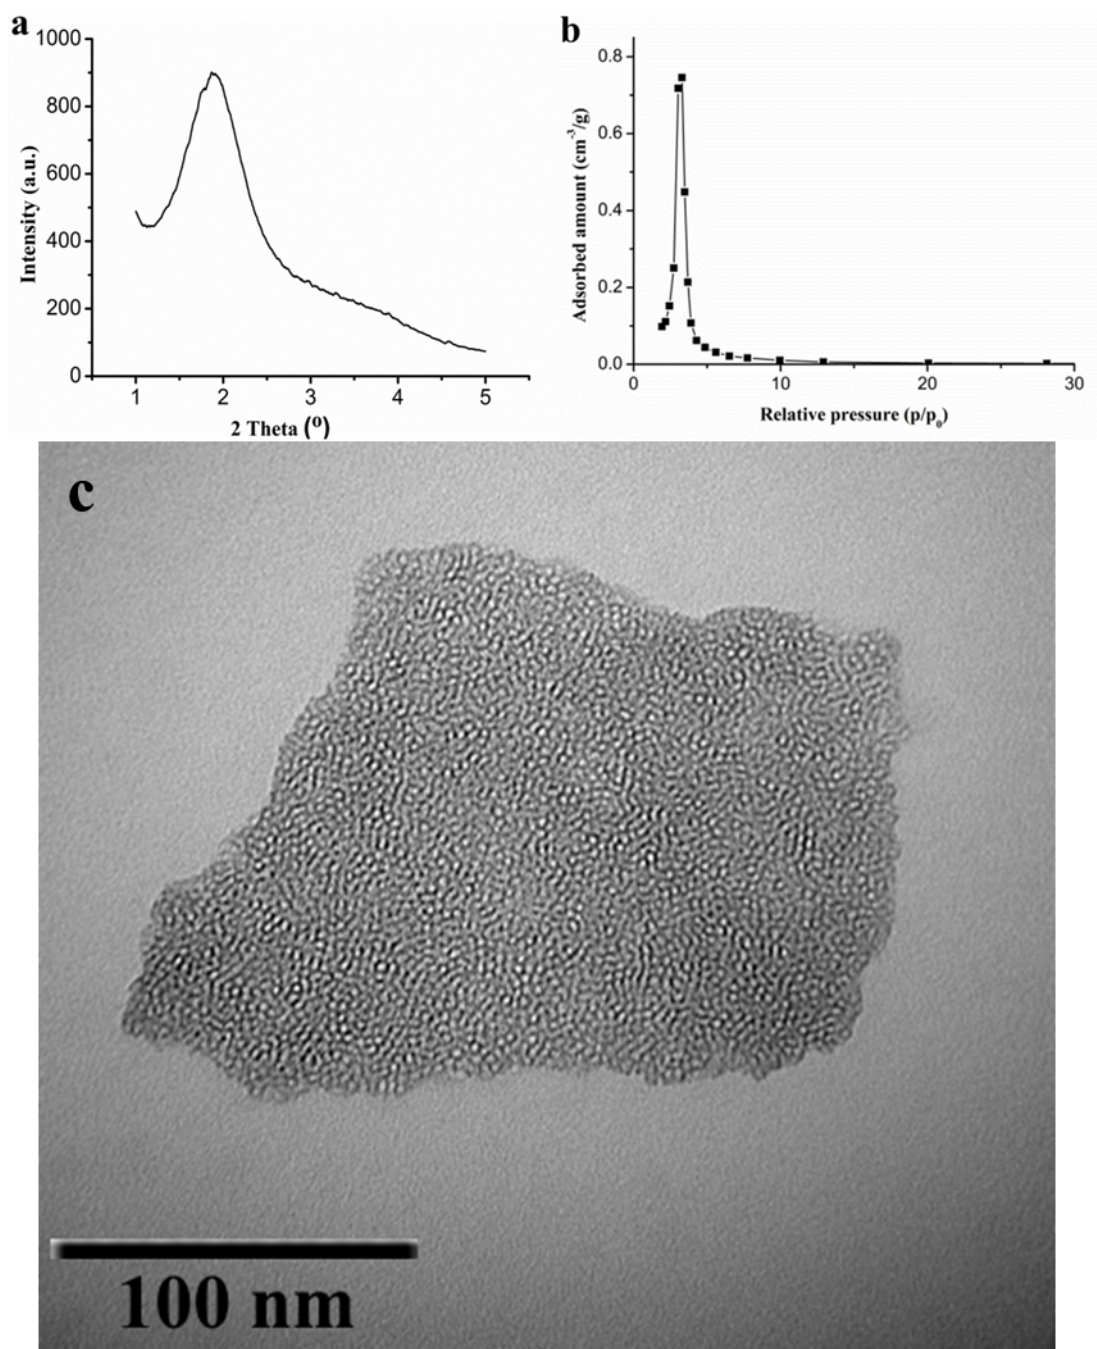

Fig. S5 The small-angle XRD pattern (a), pore size distribution (b) and amplifying TEM image (c) of rNGO@mSiO<sub>2</sub>.

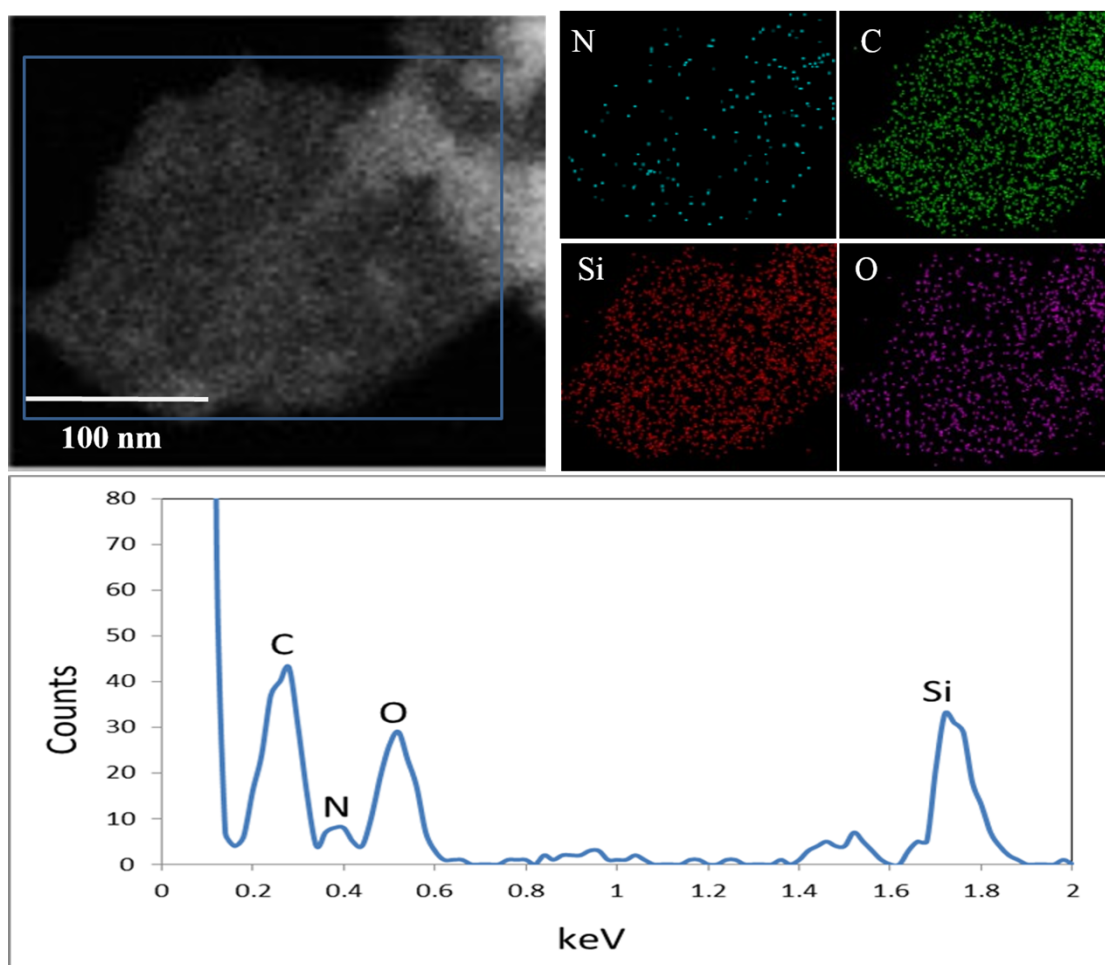

Fig. S6 The TEM-EDS images of rNGO@mSiO<sub>2</sub>@pNIPAM-co-pAAm

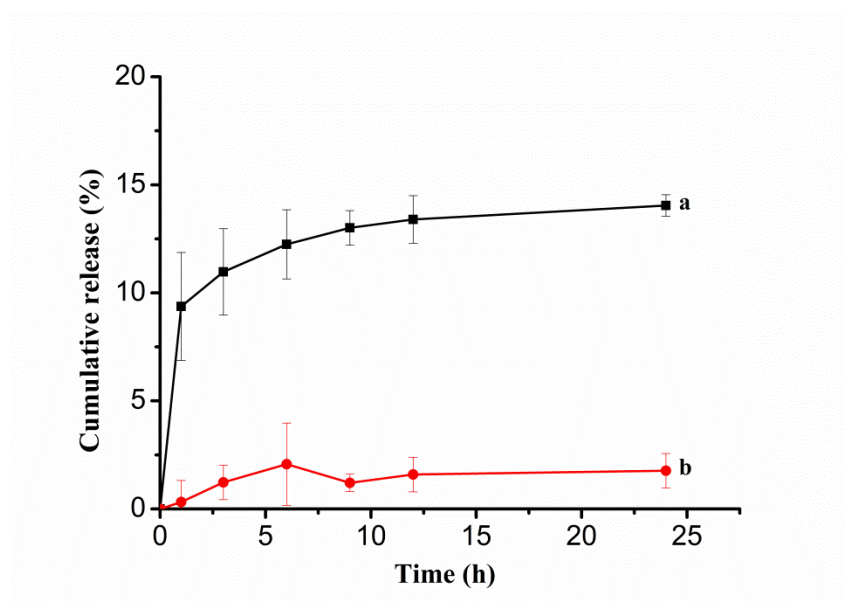

Fig. S7 The release of loaded DOX from rNGO@mSiO<sub>2</sub>@pNIPAM-co-pAAm in 24 h at pH=7.4 and 50 °C (a) or 37 °C (b).



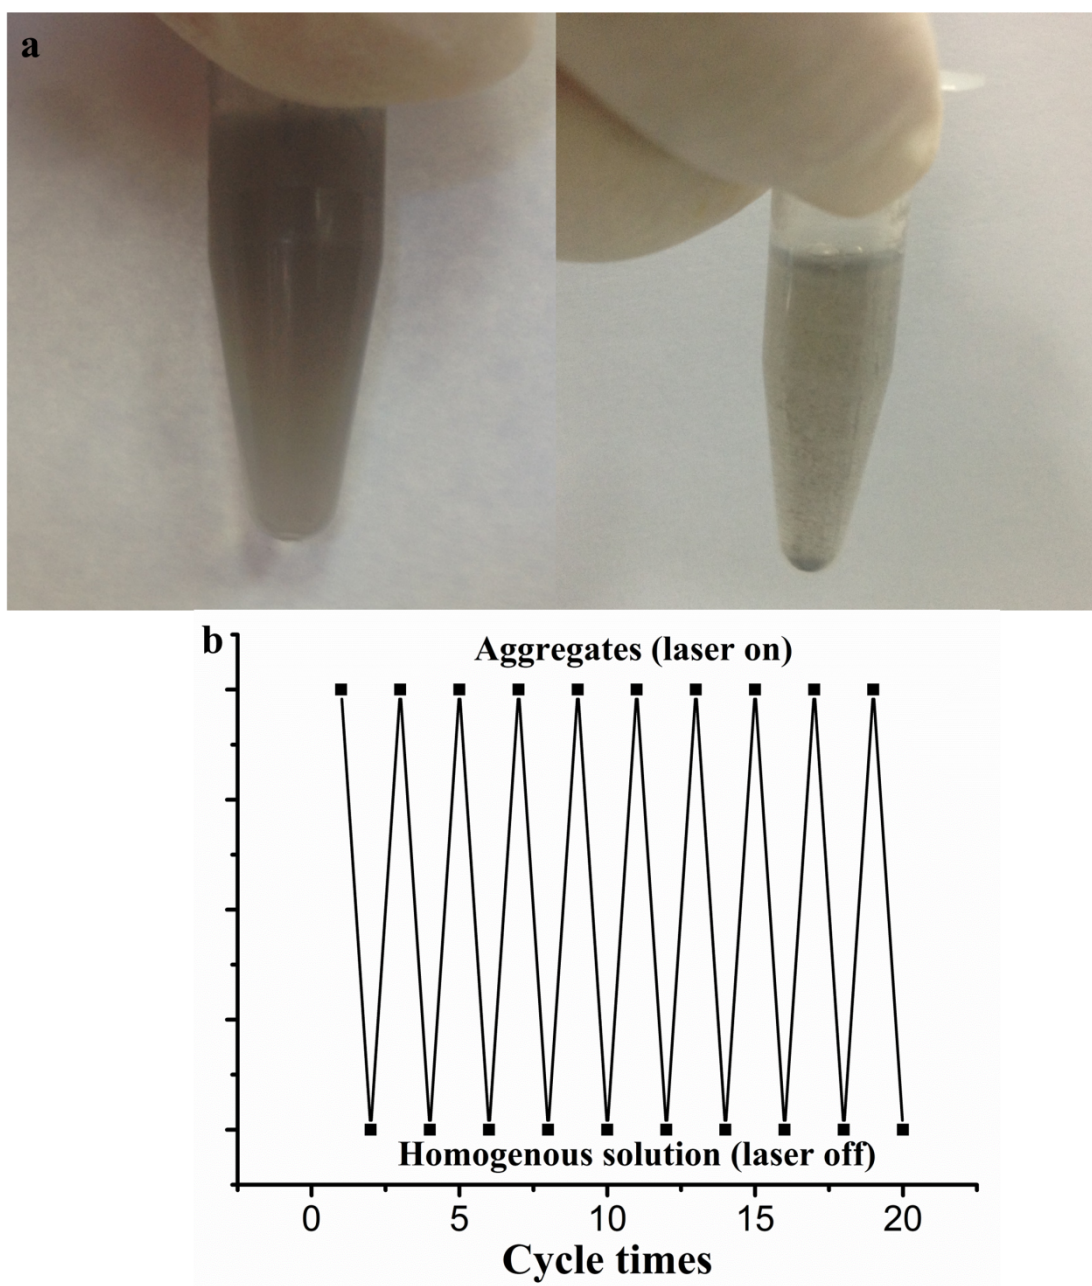

Fig. S8 The images of rNGO@mSiO<sub>2</sub>@pNIPAM-co-pAAm dispersing in the PBS buffer without (a, left) and with (a, right) NIR irradiation; the stability of reversible transformation ability (b).

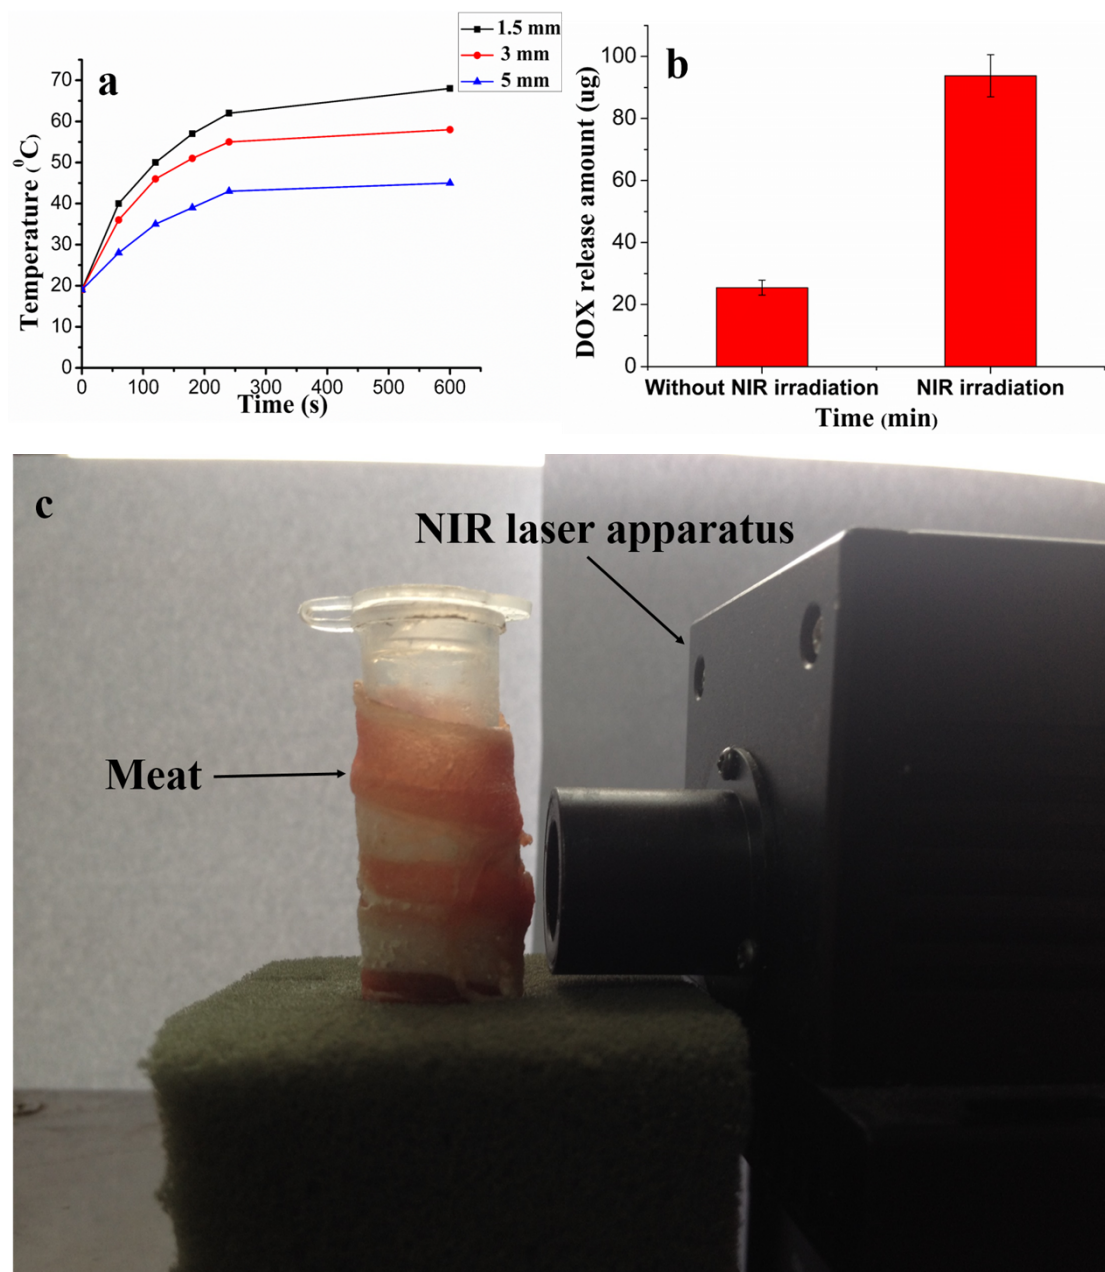

Fig. S9 The change of temperature of rNGO@mSiO<sub>2</sub>@pNIPAM-co-pAAm solution encompassed by different thickness of fresh meat (a), the simulative in vivo drug release behavior (b) and photo of simulative in vivo application (c).

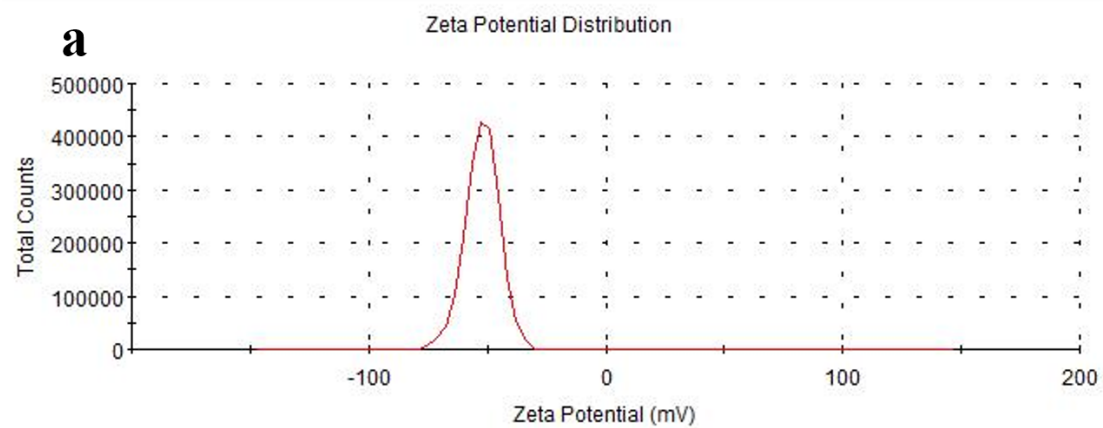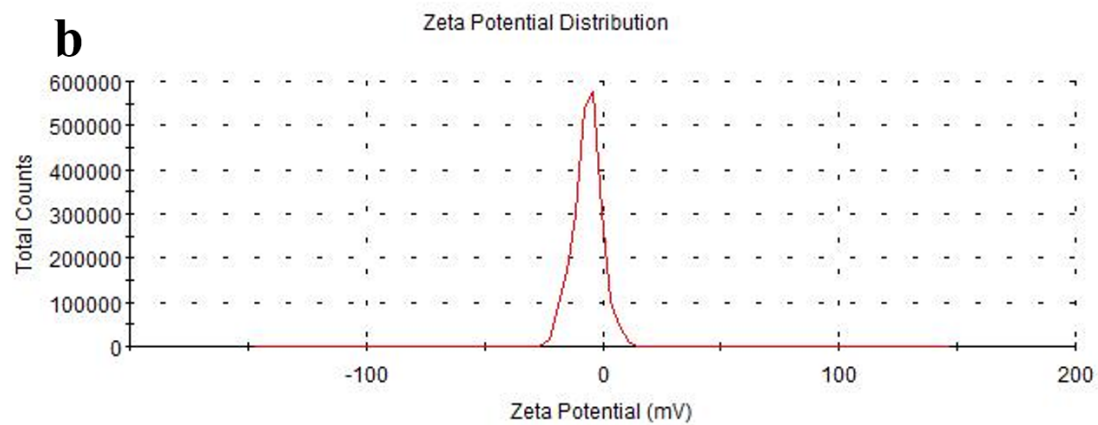

Fig. S10 The zeta potential of rNGO@mSiO<sub>2</sub> (a) and rNGO@mSiO<sub>2</sub>@pNIPAM-co-pAAm (b).

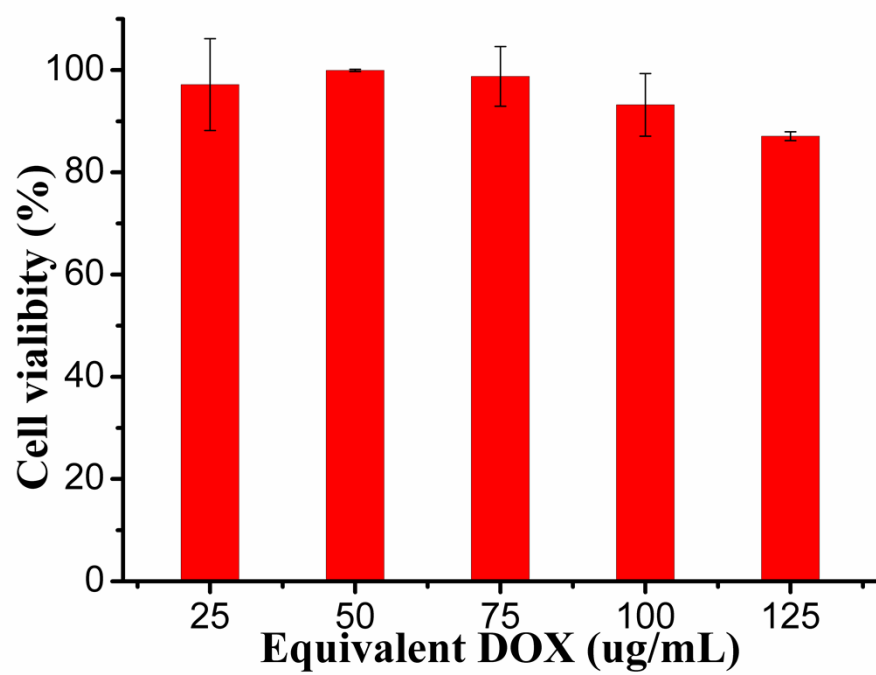

**Fig. S11** The viability of HeLa cells incubated with different amounts of rNGO@mSiO<sub>2</sub> in 24 h.
